# Supplementary material for: Mechanochemical Approach to Obtaining a Multicomponent Fisetin Delivery System Improving Its Solubility and Biological Activity
Source: MDPI journal article supplement (doi:10.3390/ijms25073648), 2024-03-25
Supplement: s1 [file s1]

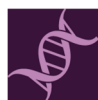

Supplementary materials

# Mechanistic Approach to Obtaining a Multicomponent Fisetin Delivery System Improving Its Solubility and Biological Activity

Natalia Rosiak <sup>1</sup>, Ewa Tykarska <sup>2</sup> and Judyta Cielecka-Piontek <sup>1,\*</sup>

<sup>1</sup> Department of Pharmacognosy and Biomaterials, Faculty of Pharmacy, Poznan University of Medical Sciences, 3 Rokietnicka St., 60-806 Poznan, Poland; nrosiak@ump.edu.pl (N.R.); jpiontek@ump.edu.pl (J.C.-P.)

<sup>2</sup> Department of Chemical Technology of Drugs, Poznan University of Medical Sciences, 3 Rokietnicka St., 60-806 Poznan, Poland; etykarsk@ump.edu.pl (E.T.)

\* Correspondence: jpiontek@ump.edu.pl (J.C.P.); Tel.: +48 61 641 83 95.

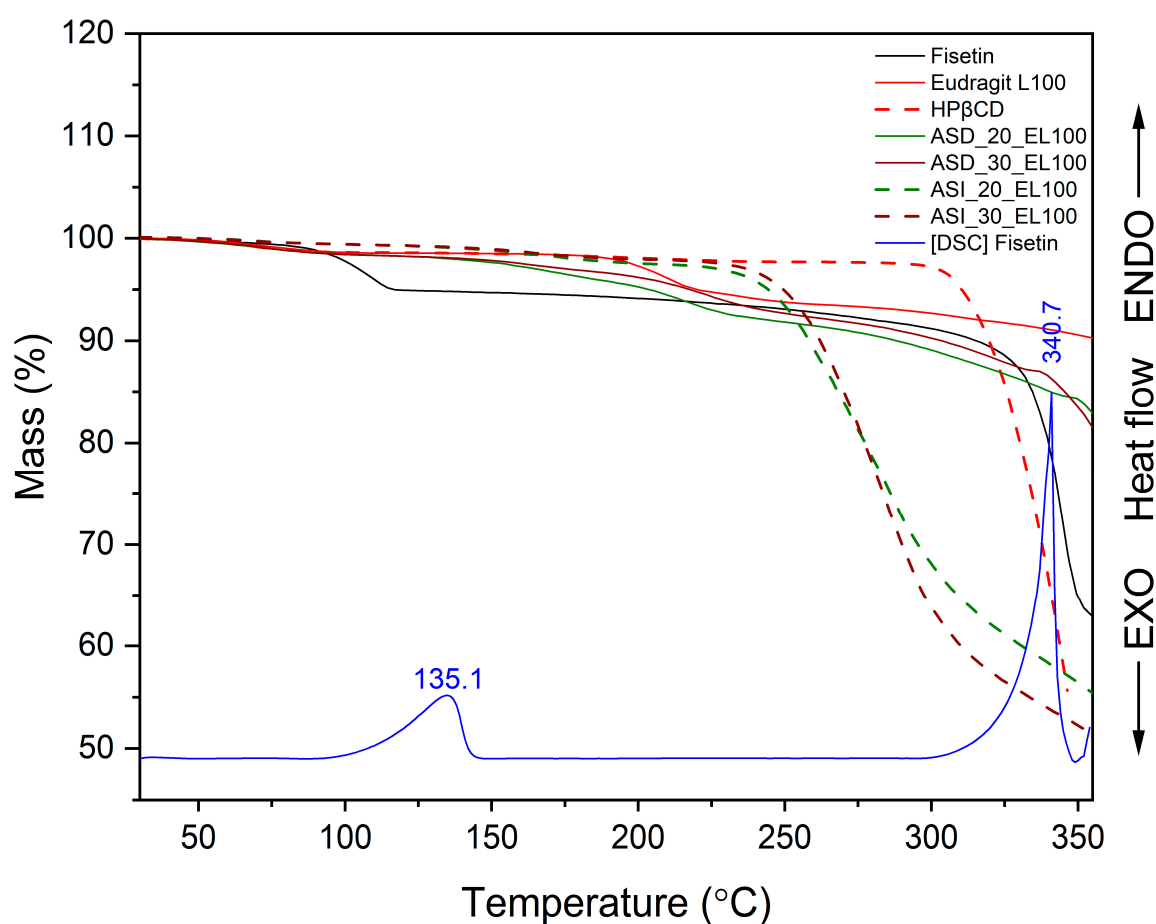

**Figure S1.** TG and DSC analysis: TG thermograms of neat compounds fisetin (FIS), Eudragit® L100 (EL100), 2-Hydroxypropyl- $\beta$ -cyclodextrin (HP $\beta$ CD); amorphous solid dispersion of FIS-EL100 (ASD), and amorphous solid inclusion of FIS-EL100-HP $\beta$ CD (ASI); DSC thermogram recorded during the first heating scan for fisetin (blue line).

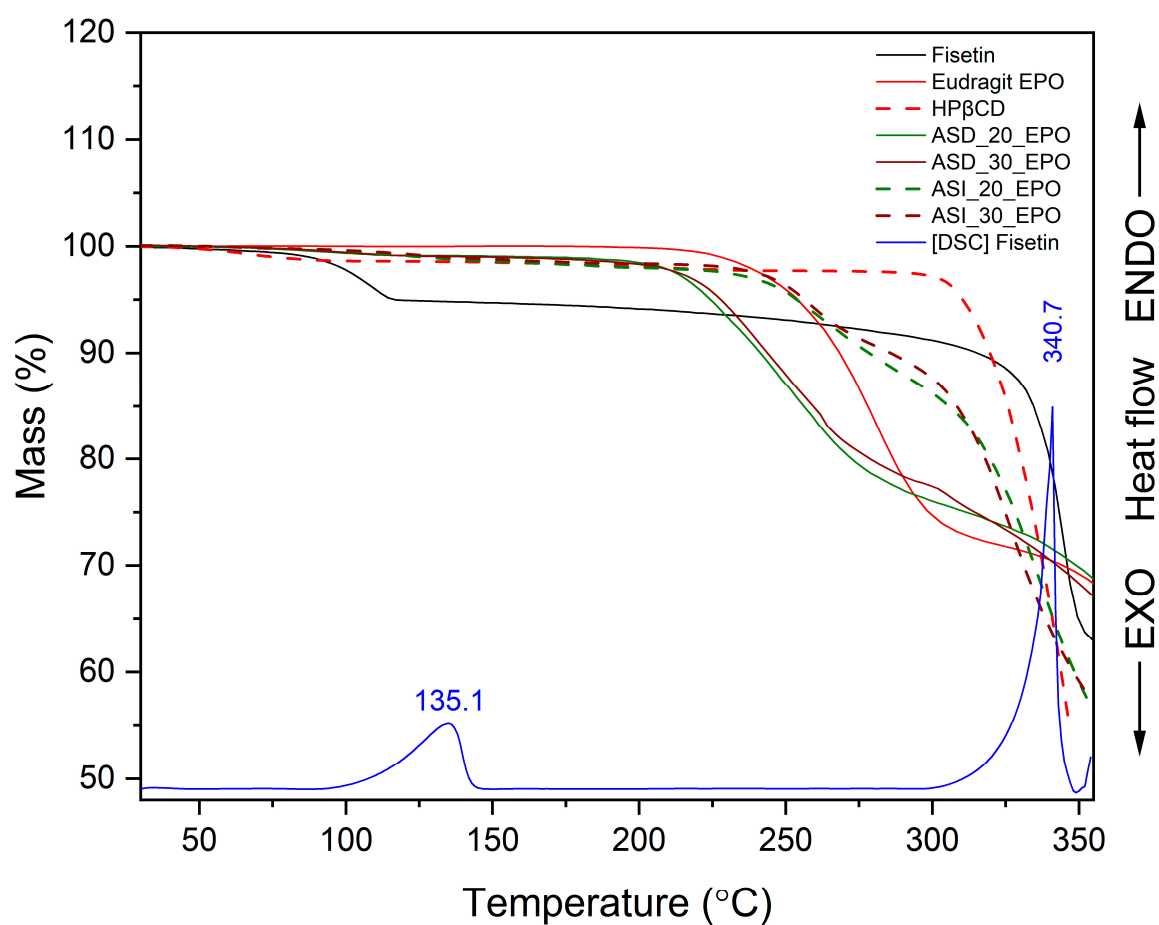

**Figure S2.** TG and DSC analysis: TG thermograms of neat compounds fisetin (FIS), Eudragit® L100 (EL100), 2-Hydroxypropyl- $\beta$ -cyclodextrin (HP $\beta$ CD), amorphous solid dispersion of FIS-EPO (ASD), and amorphous solid inclusion of FIS-EPO-HP $\beta$ CD (ASI); DSC thermogram recorded during the first heating scan for fisetin (blue line).

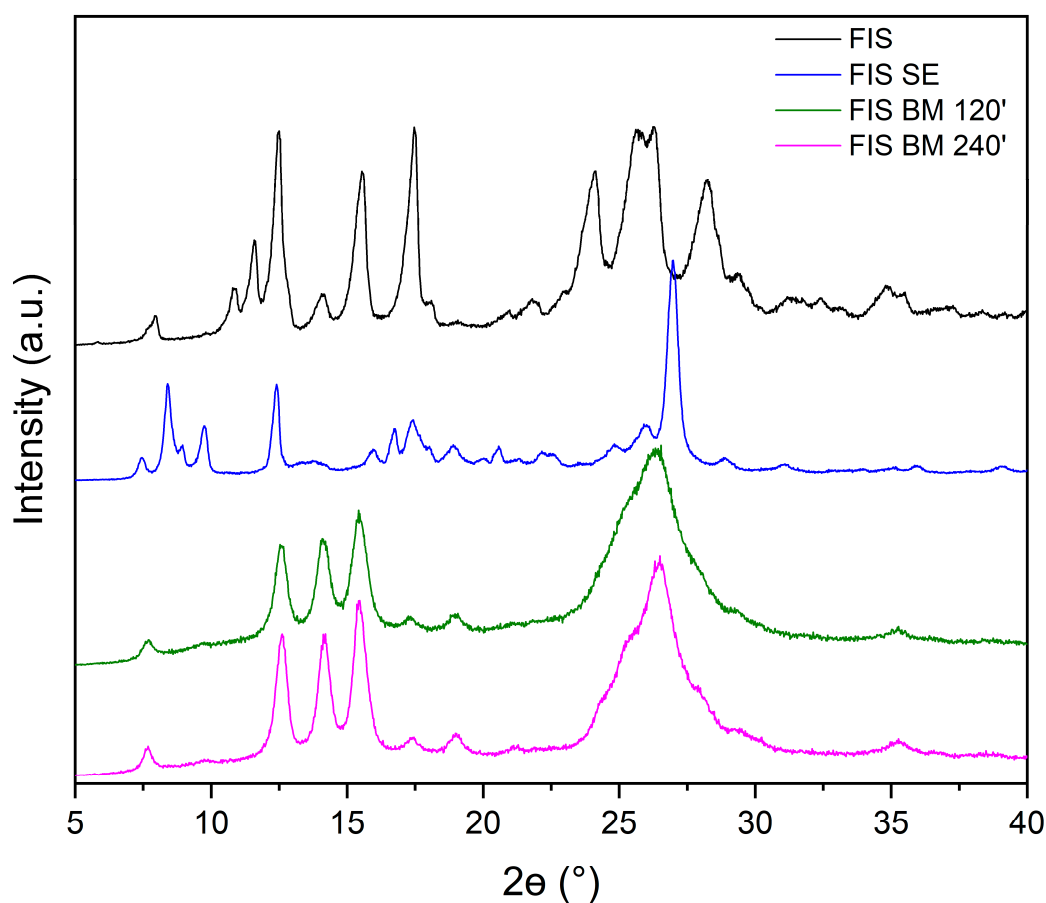

**Figure S3.** XRPD analysis: Diffractograms of FIS (neat fisetin), FIS SE (FIS after solvent evaporation), FIS BM 120' and FIS BM 240' (FIS after 120 and 240 minutes of milling, respectively).

#### Description of procedures:

**FIS SE:** 100 mg of FIS was added to a conical flask containing 25 mL of ethanol and placed in an ultrasound bath for about 2 min to obtain a lucid solution. The FIS ethanolic solution was poured into a round 50 mL bottom flask and placed in a rotary evaporator (Buchi, Switzerland) to remove ethanol under reduced pressure. The water bath was heated up to 50 °C. The process took enough time to dry the content of the flask visually. The sample was removed from the flask using a metal spatula.

**FIS BM:** 100 mg of FIS and two stainless steel balls with a diameter of 10 mm were placed in a 25 mL stainless steel jar. FIS milled at room temperature at 30 Hz for 120 minutes (FIS BM 120') and 240 minutes (FIS BM 240') on a Retsch MM-400 mixer mill machine (Mixer Mill, MM400, RETSCH, Bologna, Italy).

**Table S1.** Selected characteristic vibrational bands of fisetin (FIS) Eudragit® L100 (EL100), and amorphous solid dispersion of FIS-EL100 (ASD\_EL100). Assignments bands were made based on literature [1–4]

| FIS<br>[cm <sup>-1</sup> ]                                                                                                                                                                                                                                                                                                                                                                                            | EL100 | ASD_20_EL100<br>[cm <sup>-1</sup> ] | ASD_30_EL100<br>[cm <sup>-1</sup> ] | Assignments                                            |
|-----------------------------------------------------------------------------------------------------------------------------------------------------------------------------------------------------------------------------------------------------------------------------------------------------------------------------------------------------------------------------------------------------------------------|-------|-------------------------------------|-------------------------------------|--------------------------------------------------------|
|  <p><b>Copyright:</b> © 2024 by the authors. Licensee MDPI, Basel, Switzerland. This article is an open access article distributed under the terms and conditions of the Creative Commons Attribution (CC BY) license (<a href="https://creativecommons.org/licenses/by/4.0/">https://creativecommons.org/licenses/by/4.0/</a>).</p> |       |                                     |                                     |                                                        |
| 627                                                                                                                                                                                                                                                                                                                                                                                                                   |       | 621                                 | 621                                 | OCCC t (A)<br>oop + CCOC<br>t (A) oop                  |
| 675                                                                                                                                                                                                                                                                                                                                                                                                                   |       | 673                                 | 672                                 | CCO b (B, C)                                           |
| 770                                                                                                                                                                                                                                                                                                                                                                                                                   |       | 775                                 | 773                                 | CO s (B)                                               |
| 789                                                                                                                                                                                                                                                                                                                                                                                                                   |       | ↓                                   |                                     | HCCC t (B)                                             |
| 808                                                                                                                                                                                                                                                                                                                                                                                                                   |       | *                                   | *                                   | HCCC t (A)                                             |
| 854                                                                                                                                                                                                                                                                                                                                                                                                                   |       | 847                                 | 847                                 | HCCC b (A)                                             |
| 872                                                                                                                                                                                                                                                                                                                                                                                                                   |       | *                                   | *                                   | HCCC b (A)                                             |
| 935                                                                                                                                                                                                                                                                                                                                                                                                                   |       | ↓                                   |                                     | CCC b (A, B,<br>C)                                     |
| 974                                                                                                                                                                                                                                                                                                                                                                                                                   |       | *                                   | *                                   | CCCH t (A)                                             |
| 1018                                                                                                                                                                                                                                                                                                                                                                                                                  |       | #                                   | #                                   | CCO b (C–B)<br>+ HCC b (B)                             |
| 1117                                                                                                                                                                                                                                                                                                                                                                                                                  |       | *                                   | *                                   | HCC b (B) +<br>COH b (B) +<br>(4'–OH)                  |
| 1132                                                                                                                                                                                                                                                                                                                                                                                                                  |       | *                                   |                                     | COH b (A)                                              |
|                                                                                                                                                                                                                                                                                                                                                                                                                       | 1153  | 1155                                | 1155                                | –C–O–C s                                               |
| 1163                                                                                                                                                                                                                                                                                                                                                                                                                  |       | *                                   | *                                   | CC s (C)                                               |
|                                                                                                                                                                                                                                                                                                                                                                                                                       | 1192  | ↑                                   | ↑                                   | C–O vibra-<br>tion of car-<br>boxylic acid             |
| 1269                                                                                                                                                                                                                                                                                                                                                                                                                  |       | *                                   | *                                   | CC s (A, B) +<br>CO s (A)                              |
| 1329                                                                                                                                                                                                                                                                                                                                                                                                                  |       | 1325 ↓                              | 1325 ↓                              | CC s (B) +<br>COH b (B) +<br>(3'–OH; 4'–<br>OH)        |
| 1437                                                                                                                                                                                                                                                                                                                                                                                                                  |       | *                                   | *                                   | COH b (B) +<br>HCC b (B) +<br>CCC b (B) +<br>CCO b (A) |
|                                                                                                                                                                                                                                                                                                                                                                                                                       | 1449  | #                                   | #                                   | CH <sub>3</sub>                                        |
| 1476                                                                                                                                                                                                                                                                                                                                                                                                                  |       | *                                   | *                                   | HCC b (A)                                              |
|                                                                                                                                                                                                                                                                                                                                                                                                                       | 1481  | *                                   | *                                   | CH <sub>x</sub>                                        |
| 1524                                                                                                                                                                                                                                                                                                                                                                                                                  |       | 1508 ↓ #                            | 1508 ↓ #                            | C–C s                                                  |
| 1568                                                                                                                                                                                                                                                                                                                                                                                                                  |       | *                                   | *                                   | CC s (A, A–<br>C) + CC s (C)                           |

|      |      |      |      |                                                         |
|------|------|------|------|---------------------------------------------------------|
|      |      |      |      | (C2=C3) +<br>C=O s (C)                                  |
| 1601 |      | #    | #    | CC s (B)                                                |
| 1628 |      | *    | *    | CC s (A) +<br>C2=C3 s (C)                               |
|      | 1705 | 1699 | 1701 | C–O s vibra-<br>tion of car-<br>boxylic ester           |
|      | 1724 | ↓    | ↓    | C=O s vibra-<br>tion groups of<br>carboxylic ac-<br>ids |
| 3246 |      | *    | *    | CH stretch-<br>ing (A)                                  |
| 3346 |      | *    | *    | CH stretch-<br>ing (B)                                  |
| 3518 |      | *    | *    | OH group                                                |
| 3551 |      | *    | *    | OH group                                                |

Legend: # – shape change, \* – band disappearance, ↑ – intensity increase, ↓ – intensity decrease, A, B, C – ring, b - bending, oop out of the plane, s - stretching, t - torsion.

**Table S2.** Selected characteristic vibrational bands of fisetin (FIS) Eudragit® EPO (EPO), and amorphous solid dispersion of FIS-EPO (ASD\_EPO). Assignments bands were made based on literature [1–6]

| FIS<br>[cm <sup>-1</sup> ] | EPO | ASD_20_EPO<br>[cm <sup>-1</sup> ] | ASD_30_EPO<br>[cm <sup>-1</sup> ] | Assignments                                                    |
|----------------------------|-----|-----------------------------------|-----------------------------------|----------------------------------------------------------------|
| 627                        |     | 621                               | 621                               | OCCC t (A) oop + CCOC t (A) oop                                |
| 675                        |     | 671 ↓                             | 671 ↓                             | CCO b (B, C)                                                   |
| 700                        |     | 704 ↓                             | 704 ↓                             | CCCC t (A, C-B) + CCOC t (A-C, C-B) oop + OCCC t (C, B) oop    |
| 770                        |     | 773                               | 773                               | CO s (B)                                                       |
| 789                        |     | *                                 | *                                 | HCCC t (B)                                                     |
| 808                        |     | *                                 | *                                 | HCCC t (A)                                                     |
| 822                        |     | 819 #                             | 819 #                             |                                                                |
| 854                        |     | 847                               | 847                               | HCCC b (A)                                                     |
| 872                        |     | *                                 | *                                 | HCCC b (A)                                                     |
| 935                        |     | *                                 | ↓                                 | CCC b (A, B, C)                                                |
| 974                        |     | *                                 | *                                 | CCCH t (A)                                                     |
| 1018                       |     | 1015 ↓                            | 1015 ↓                            | CCO b (C-B) + HCC b (B)                                        |
| 1117                       |     | 1120 ↓                            | 1120 ↓                            | HCC b (B) + COH b (B) + (4'-OH)                                |
| 1132                       |     | *                                 | *                                 | COH b (A)                                                      |
| 1144                       |     | 1146                              | 1146                              | C-N s of aliphatic amine and/or C-O s of ester [7] or -C-O-C s |
| 1163                       |     | *                                 | *                                 | CC s (C)                                                       |
| 1206                       |     | *                                 | *                                 | CO s (A, C) + COH b (A) + (7-OH)                               |
| 1240                       |     | ↓                                 | ↓                                 | C-O s of ester                                                 |
| 1269                       |     | *                                 | *                                 | CC s (A, B) + CO s (A)                                         |
| 1269                       |     | 1267 ↑                            | 1267 ↑                            | C-O s of ester                                                 |
| 1283                       |     | *                                 | *                                 | HCC b (B)                                                      |
| 1329                       |     | ↓                                 | ↓                                 | CC s (B) + COH b (B) + (3'-OH; 4'-OH)                          |
| 1437                       |     | *                                 | *                                 | COH b (B) + HCC b (B) + CCC b (B) + CCO b (A)                  |
| 1454                       |     | ↑ #                               | ↑ #                               | C-H b of methyl                                                |
| 1476                       |     | *                                 | *                                 | HCC b (A)                                                      |
| 1524                       |     | *                                 | *                                 | C-C s                                                          |
| 1568                       |     | *                                 | *                                 | CC s (A, A-C) + CC s (C) (C2=C3) + C=O s (C)                   |
| 1601                       |     | 1607                              | 1605                              | CC s (B)                                                       |
| 1628                       |     | *                                 | *                                 | CC s (A) + C2=C3 s (C)                                         |
| 2770                       |     | ↓                                 | ↓                                 | dimethyl amino groups                                          |
| 2822                       |     | ↓                                 | ↓                                 | alkene C-H stretching                                          |
| 2949                       |     | 2953                              | 2953                              | hydrocarbon chain                                              |
| 3246                       |     | *                                 | *                                 | CH stretching (A)                                              |
| 3346                       |     | *                                 | *                                 | CH stretching (B)                                              |
| 3518                       |     | *                                 | *                                 | OH group                                                       |
| 3551                       |     | *                                 | *                                 | OH group                                                       |

Legend: # – shape change, \* – band disappearance, ↑ – intensity increase, ↓ – intensity decrease, A, B, C – ring, b – bending, oop out of the plane, s – stretching, t – torsion.

## References

1. Sip, S.; Rosiak, N.; Sip, A.; Żarowski, M.; Hojan, K.; Cielecka-Piontek, J. A Fisetin Delivery System for Neuroprotection: A Co-Amorphous Dispersion Prepared in Supercritical Carbon Dioxide. *Antioxidants* 2023, 13, 24, doi:10.3390/antiox13010024.
2. Rosiak, N.; Tykarska, E.; Cielecka-Piontek, J. The Study of Amorphous Kaempferol Dispersions Involving FT-IR Spectroscopy. *Int. J. Mol. Sci.* 2023, 24, 17155, doi:10.3390/ijms242417155.

3. Marković, J.M.D.; Marković, Z.S.; Milenković, D.; Jeremić, S. Application of comparative vibrational spectroscopic and mechanistic studies in analysis of fisetin structure. *Spectrochim. Acta Part A Mol. Biomol. Spectrosc.* 2011, 83, 120–129.
4. Awadeen, R.H.; Boughdady, M.F.; Zaghoul, R.A.; Elsaed, W.M.; Abu Hashim, I.I.; Meshali, M.M. Formulation of lipid polymer hybrid nanoparticles of the phytochemical Fisetin and its in vivo assessment against severe acute pancreatitis. *Sci. Rep.* 2023, 13, 19110.
5. Inam, S.; Irfan, M.; Lali, N.U.A.; Khalid Syed, H.; Asghar, S.; Khan, I.U.; Khan, S.-U.-D.; Iqbal, M.S.; Zaheer, I.; Khames, A.; et al. Development and Characterization of Eudragit® EPO-Based Solid Dispersion of Rosuvastatin Calcium to Foresee the Impact on Solubility, Dissolution and Antihyperlipidemic Activity. *Pharmaceuticals* 2022, 15, 492, doi:10.3390/ph15040492.
6. Linares, V.; Yarcce, C.J.; Echeverri, J.D.; Galeano, E.; Salamanca, C.H. Relationship between degree of polymeric ionisation and hydrolytic degradation of Eudragit® E polymers under extreme acid conditions. *Polymers (Basel)*. 2019, 11, 1010.
7. Lin, S.-Y.; Cheng, W.-T.; Wei, Y.-S.; Lin, H.-L. DSC-FTIR microspectroscopy used to investigate the heat-induced intramolecular cyclic anhydride formation between Eudragit E and PVA copolymer. *Polym. J.* 2011, 43, 577–580, doi:10.1038/pj.2011.15.

**Disclaimer/Publisher's Note:** The statements, opinions and data contained in all publications are solely those of the individual author(s) and contributor(s) and not of MDPI and/or the editor(s). MDPI and/or the editor(s) disclaim responsibility for any injury to people or property resulting from any ideas, methods, instructions or products referred to in the content.
